# Supplementary material for: Successful In Vitro Shoot Multiplication of Quercus robur L. Trees Aged up to 800 Years
Source: MDPI journal article supplement (doi:10.3390/plants12122230), 2023-06-06
Supplement: s1 [file s1]

## SUPPLEMENTAL DATA

**Table S1.** Analysis of variance components using the residual maximum likelihood (REML) method for the average number of shoots produced by 21 monumental trees. Percentage of variance components (%) was calculated using Wald chi-squared test.

| Factor | Variation | Components | Wald test      | %     |
|--------|-----------|------------|----------------|-------|
| Tree   | 5.788951  | 4.430038   | $p = 0.0034$ * | 85.27 |
| Others |           | 0.65257    |                | 14.73 |
| Sum    |           | 5.195295   |                | 100   |

\* Significant differences

**Table S2A.** Analysis of variance (MANOVA) for the average number of shoots produced in in vitro cultures by trees of different ages, in the period from the 18<sup>th</sup> to the 21<sup>st</sup> month of cultivation. NumDF, degrees of freedom in the numerator; denDF, DF in the denominator.

|             | Test          | F                   | NumDF | DenDF  | $p$                 |
|-------------|---------------|---------------------|-------|--------|---------------------|
| Tree        | F             | 3.1168              | 10    | 44     | <b>0.0044</b> *     |
| Time        | F             | 15.7938             | 3     | 42     | <b>&lt;0.0001</b> * |
| Interaction |               |                     |       |        |                     |
| Tree x Time | Wilks' Lambda | 2.7204 <sup>1</sup> | 30    | 123.95 | <b>&lt;0.0001</b> * |

\* Significant differences

<sup>1</sup> Approximated F value

**Table S2B.** Analysis of variance (MANOVA) for the average length of shoots produced in in vitro cultures by trees of different ages, in the period from the 18<sup>th</sup> to the 21<sup>st</sup> month of cultivation. NumDF, degrees of freedom in the numerator; denDF, DF in the denominator.

|             | Test          | F                  | NumDF | DenDF  | $p$                 |
|-------------|---------------|--------------------|-------|--------|---------------------|
| Tree        | F             | 3.6892             | 10    | 44     | <b>0.0044</b> *     |
| Time        | F             | 24.6808            | 3     | 42     | <b>&lt;0.0001</b> * |
| Interaction |               |                    |       |        |                     |
| Tree x Time | Wilks' Lambda | 34332 <sup>1</sup> | 30    | 123.95 | <b>&lt;0.0001</b> * |

\* Significant differences

<sup>1</sup> Approximated F value

**Table S3A.** Analysis of variance for the average number of new shoots grown under different conditions on WPM medium. Df, degrees of freedom; SS, sum of squares; MS, mean squares.

|                 | <b>Df</b> | <b>SS</b> | <b>MS</b> | <b>F</b> | <b><i>p</i></b>     |
|-----------------|-----------|-----------|-----------|----------|---------------------|
| Type of culture | 2         | 8988.937  | 4494.47   | 63.0215  | <b>&lt;0.0001 *</b> |
| Error           | 357       | 25459.96  | 71.32     |          |                     |
| Total           | 359       | 34448.9   |           |          |                     |

\* Significant differences

**Table S3B.** Analysis of variance for the average number of new shoots grown under different conditions on BG1 medium. Df, degrees of freedom; SS, sum of squares; MS, mean squares.

|                 | <b>Df</b> | <b>SS</b> | <b>MS</b> | <b>F</b> | <b><i>p</i></b> |
|-----------------|-----------|-----------|-----------|----------|-----------------|
| Type of culture | 2         | 206.0802  | 103.04    | 6.9276   | <b>0.0013 *</b> |
| Error           | 141       | 2097.215  | 14.874    |          |                 |
| Total           | 143       | 2303.295  |           |          |                 |

\* Significant differences

**Table S3C.** Analysis of variance for the average number of new shoots grown under different conditions on WPM medium. Df, degrees of freedom; SS, sum of squares; MS, mean squares.

|                 | <b>Df</b> | <b>SS</b> | <b>MS</b> | <b>F</b> | <b><i>p</i></b>     |
|-----------------|-----------|-----------|-----------|----------|---------------------|
| Type of culture | 2         | 79.90556  | 39.9528   | 17.2493  | <b>&lt;0.0001 *</b> |
| Error           | 357       | 826.8833  | 2.3162    |          |                     |
| Total           | 359       | 906.7889  |           |          |                     |

\* Significant differences

**Table S3D.** Analysis of variance for the average number of new shoots grown under different conditions on modified QL medium. Df, degrees of freedom; SS, sum of squares; MS, mean squares.

|                 | <b>Df</b> | <b>SS</b> | <b>MS</b> | <b>F</b> | <b><i>p</i></b>     |
|-----------------|-----------|-----------|-----------|----------|---------------------|
| Type of culture | 2         | 13.0417   | 6.52083   | 11.9472  | <b>&lt;0.0001 *</b> |
| Error           | 141       | 76.95833  | 0.5458    |          |                     |
| Total           | 143       | 90        |           |          |                     |

\* Significant differences

**Table S4.** The composition of modified Quoirin and Lepoivre (QL) and Woody Plant Medium.

| <b>Macronutrients</b>                                | <b>QL (mg· L<sup>-1</sup>)</b> | <b>WPM (mg· L<sup>-1</sup>)</b> |
|------------------------------------------------------|--------------------------------|---------------------------------|
| NH <sub>4</sub> NO <sub>3</sub>                      | 50.00                          | 400.00                          |
| K <sub>2</sub> SO <sub>4</sub>                       | 800.00                         | 990.00                          |
| CaCl <sub>2</sub>                                    | -                              | 72.50                           |
| Ca(NO <sub>3</sub> ) <sub>2</sub> ·4H <sub>2</sub> O | 1000.00                        | 471.26                          |
| MgSO <sub>4</sub> ·7H <sub>2</sub> O                 | 200.00                         | 180.54                          |
| KH <sub>2</sub> PO <sub>4</sub>                      | 200.00                         | 170.00                          |
| <b>Micronutrients</b>                                | <b>QL (mg· L<sup>-1</sup>)</b> | <b>WPM (mg· L<sup>-1</sup>)</b> |
| FeEDDHA                                              | 100.00                         | 36.70                           |
| ZnNa <sub>2</sub> EDTA                               | 10.00                          | -                               |
| ZnSO <sub>4</sub> ·7H <sub>2</sub> O                 | -                              | 8.60                            |
| H <sub>3</sub> BO <sub>3</sub>                       | 8.00                           | 6.20                            |
| MnSO <sub>4</sub> ·H <sub>2</sub> O                  | 10.00                          | 22.30                           |
| Na <sub>2</sub> MoO <sub>4</sub> ·2H <sub>2</sub> O  | 0.25                           | 0.25                            |
| CuSO <sub>4</sub> ·5H <sub>2</sub> O                 | 0.20                           | 0.25                            |
| CoCl <sub>2</sub> ·6H <sub>2</sub> O                 | 0.02                           | -                               |
| NiCl <sub>2</sub> ·6H <sub>2</sub> O                 | 0.01                           | -                               |
| KI                                                   | 0.20                           | -                               |
| <b>Vitamins and aminoacids</b>                       | <b>QL (mg· L<sup>-1</sup>)</b> | <b>WPM (mg· L<sup>-1</sup>)</b> |
| m-inositol                                           | 200.00                         | 100.00                          |
| thiamine                                             | 2.00                           | 1.00                            |
| pyridoxine                                           | 0.50                           | 0.50                            |
| nicotinic acid                                       | 2.00                           | 0.50                            |
| glycine                                              | 2.00                           | 2.00                            |
| <b>pH</b>                                            | <b>5.8</b>                     | <b>5.8</b>                      |
